# Supplementary material for: TNF inhibits catecholamine production from induced sympathetic neuron-like cells in rheumatoid arthritis and osteoarthritis in vitro
Source: Springer Nature journal article supplement (doi:10.1038/s41598-018-27927-8), 2018-06-19

# **TNF inhibits catecholamine production from induced sympathetic neuron-like cells in rheumatoid arthritis and osteoarthritis *in vitro***

Markus Herrmann<sup>1</sup>, Sven Anders<sup>2</sup>, Rainer H. Straub MD<sup>1\*</sup>, Zsuzsa Jenei-Lanzl PhD<sup>1,3</sup>

<sup>1</sup>Laboratory of Experimental Rheumatology and Neuroendocrine Immunology, Department of Internal Medicine, University Hospital Regensburg, Germany

<sup>2</sup>Department of Orthopedic Surgery, University Hospital Regensburg, Asklepios Clinic Bad Abbach, Kaiser Karl V Allee 3, 93077, Bad Abbach, Germany

<sup>3</sup>Dr. Rolf M. Schwiete Research Unit for Osteoarthritis, Orthopedic University Hospital Friedrichsheim gGmbH, Frankfurt/Main, Germany

## **\*Corresponding author**

Rainer H. Straub

Laboratory of Experimental Rheumatology and Neuroendocrine Immunology

Department of Internal Medicine I

University Hospital Regensburg

Biopark I, Am Biopark 9

93053 Regensburg, Germany

Phone: +49 941 944 7120

Email: rainer.straub@ukr.de

**Supplementary Figure 1.** Rabbit IgG isotype control pictures of OA and RA iTHs as applied in the context of immunofluorescent staining given in Figures 3.

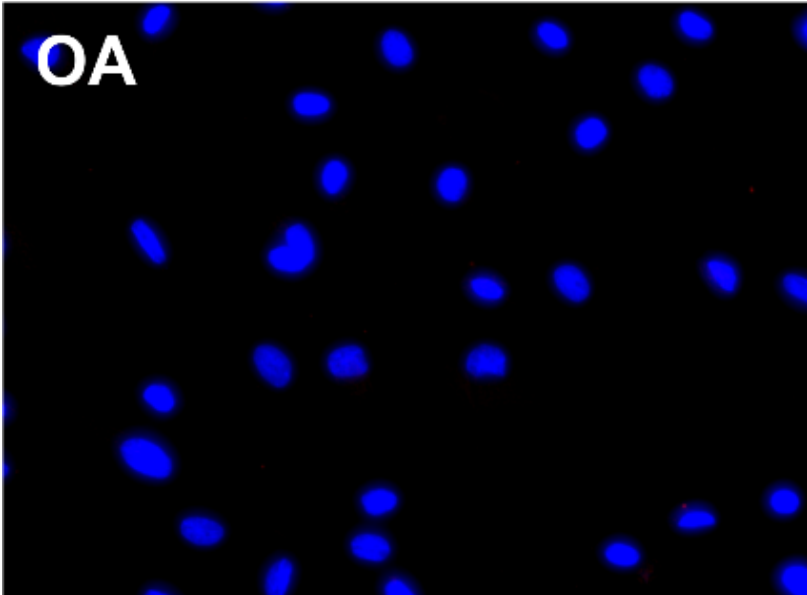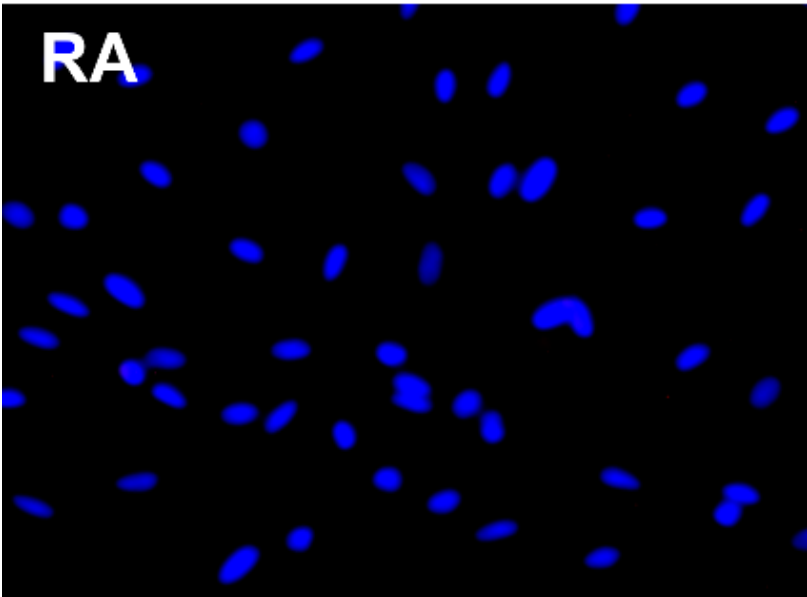

Supplement: MOESM1 [file 41598_2018_27927_MOESM1_ESM.pdf]
